# Supplementary material for: Proton-irradiated breast cells: molecular points of view
Source: PubMed Central journal article supplement (PMC6640903; doi:10.1093/jrr/rrz032), 2019-05-28

# MCF7 Breast Cancer cell line

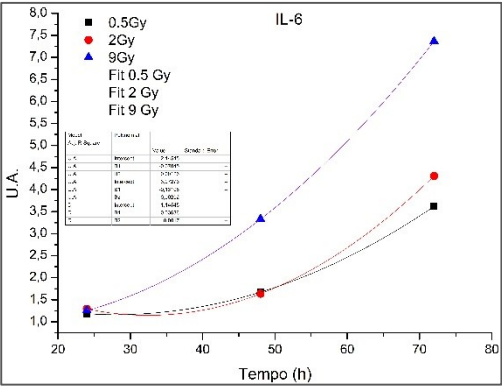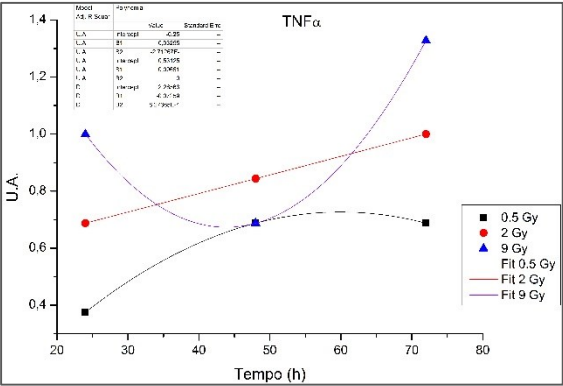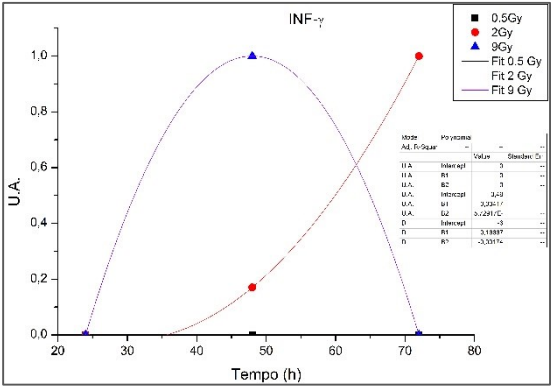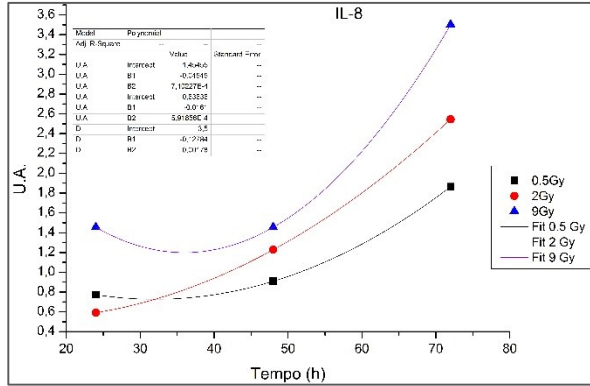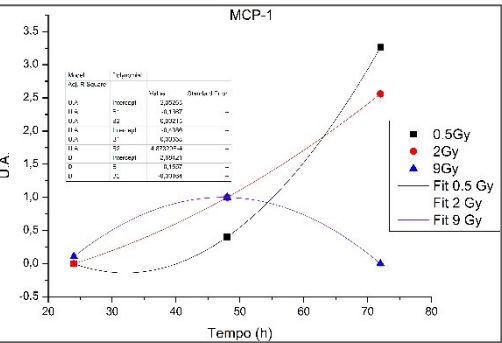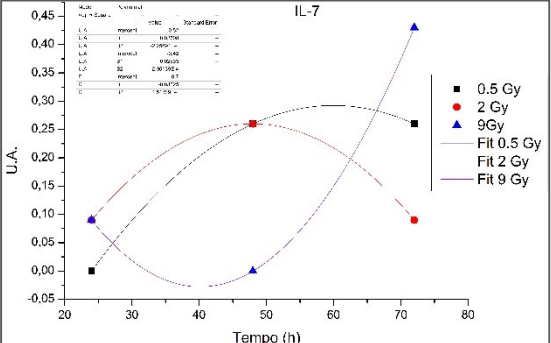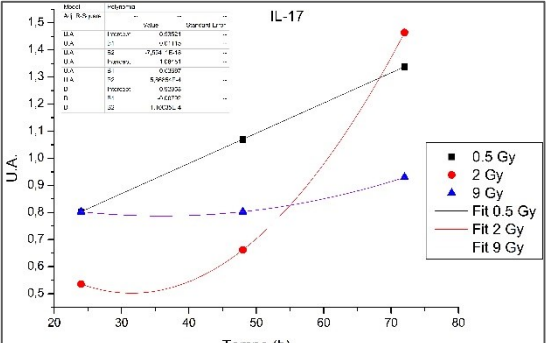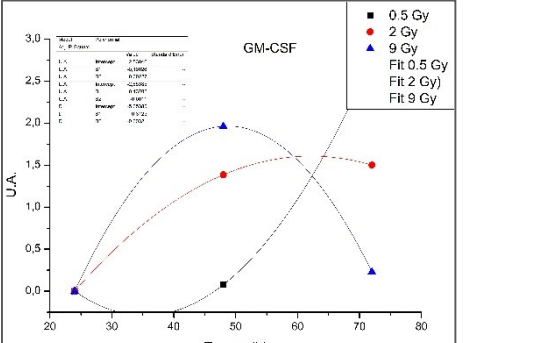

# MCF10 A non tumorigenic mammary epithelial cells\_I°

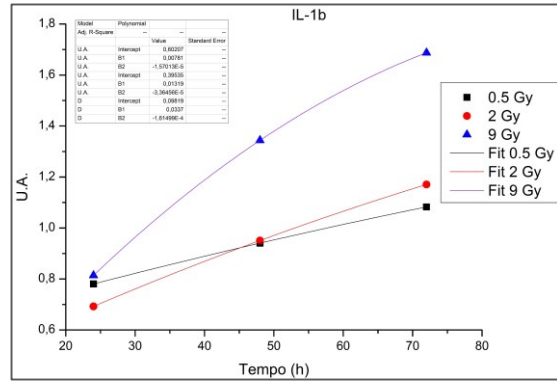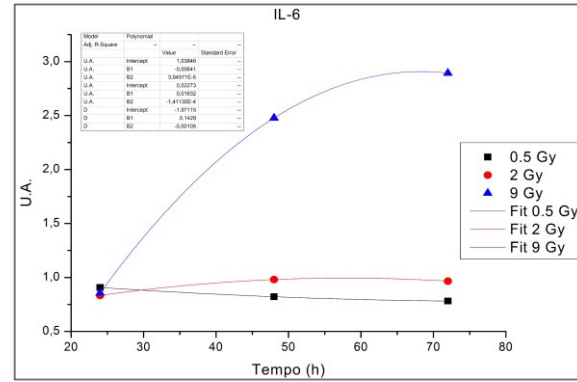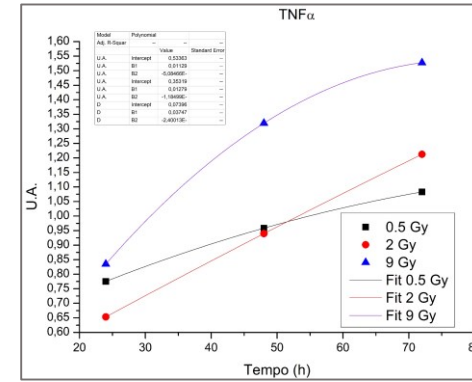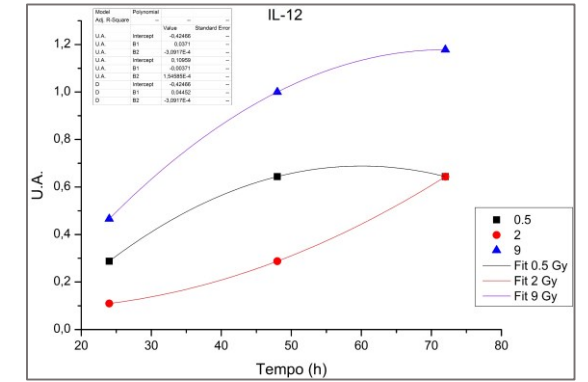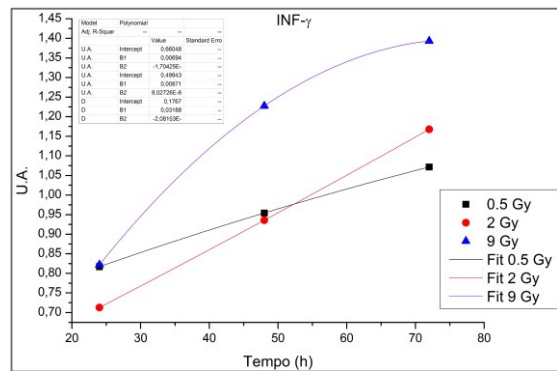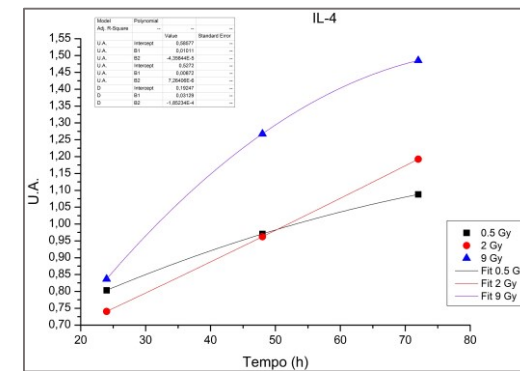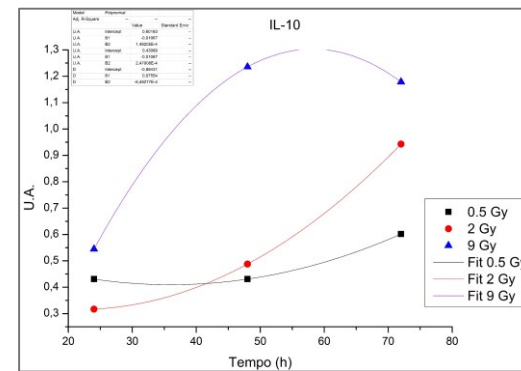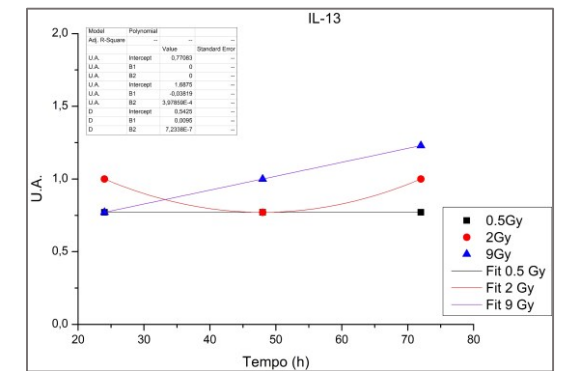

# MCF10 A non tumorigenic mammary epithelial cells\_II°

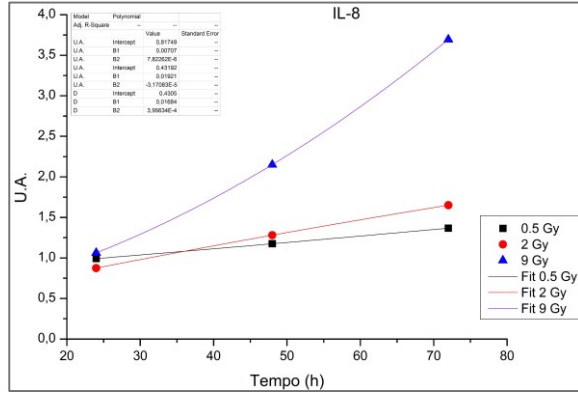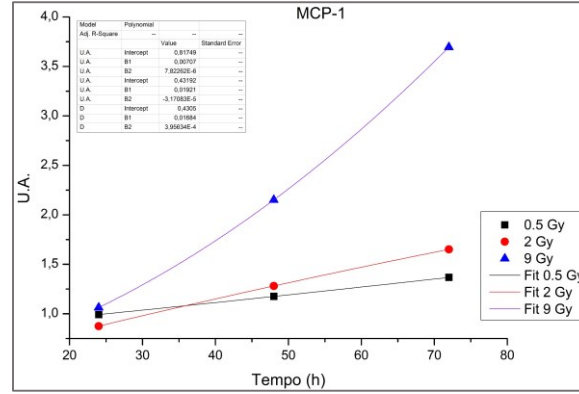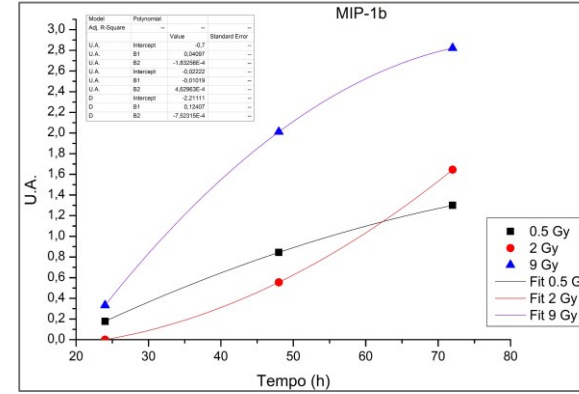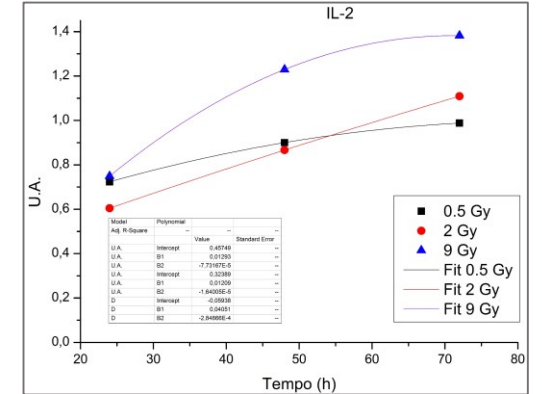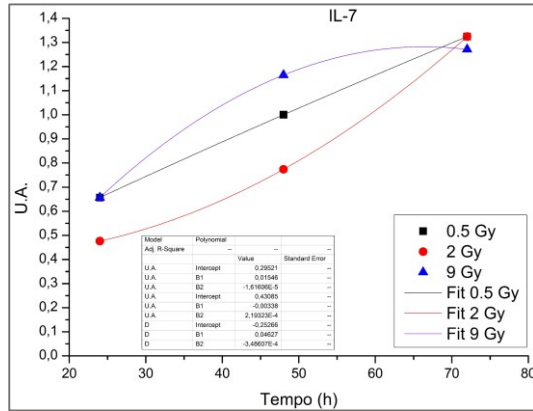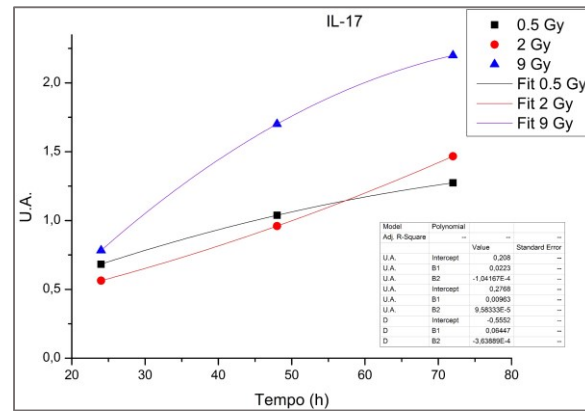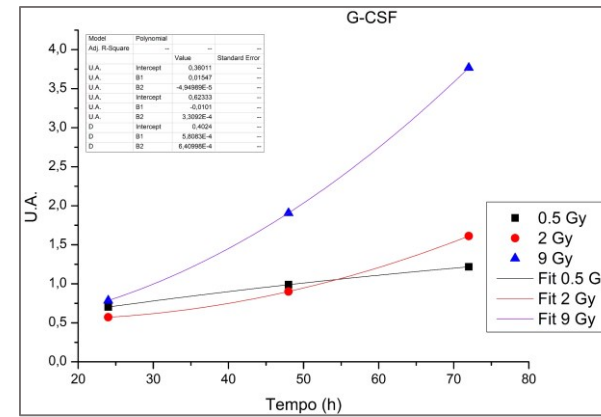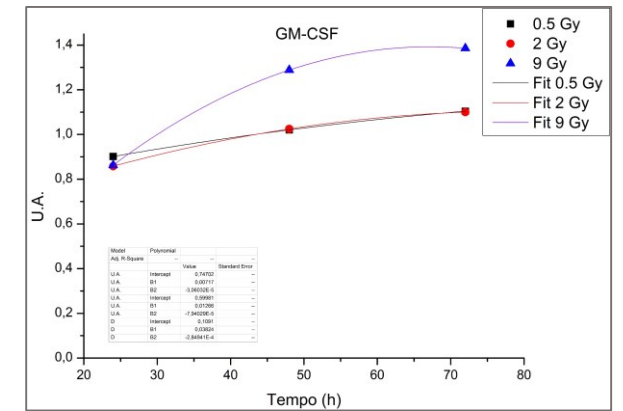

# MDA-MB-231 tumorigenic cell line

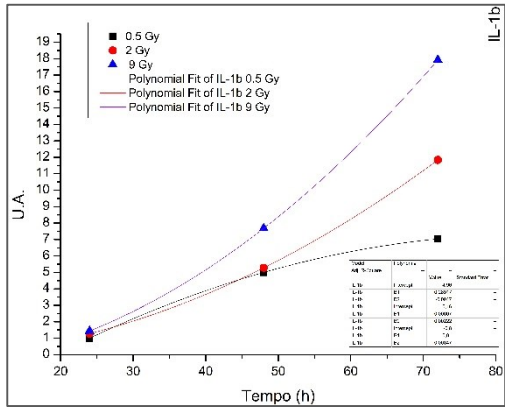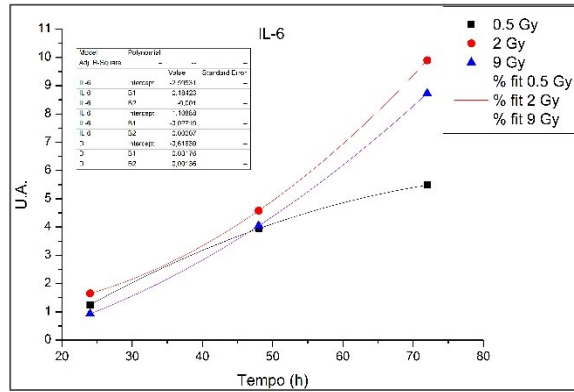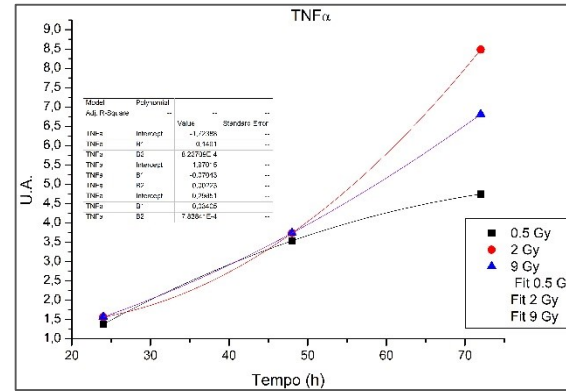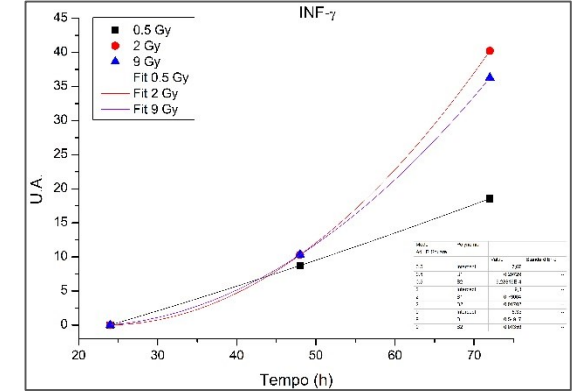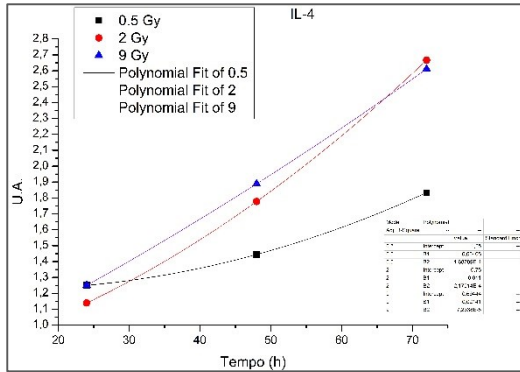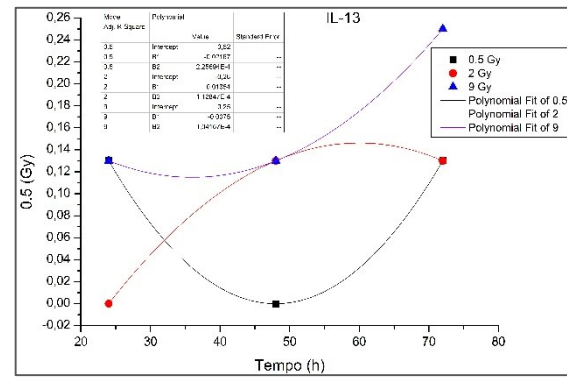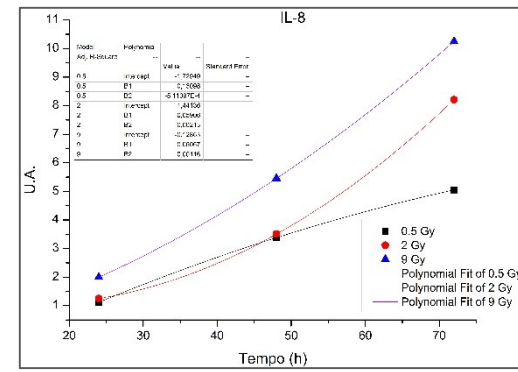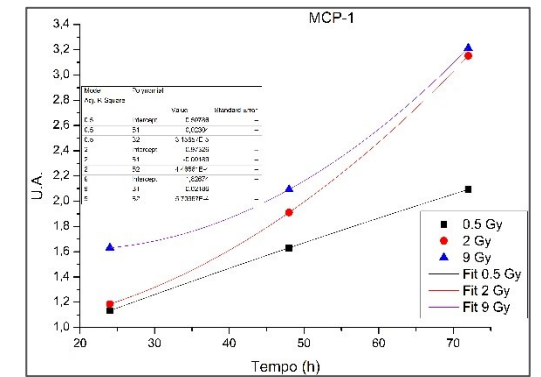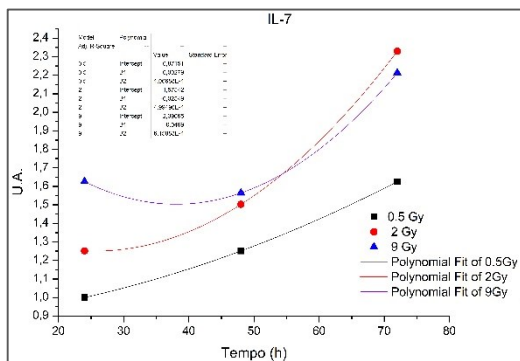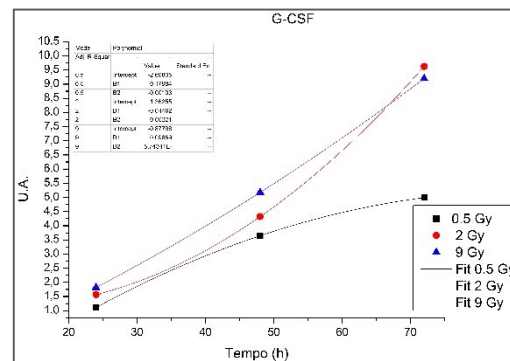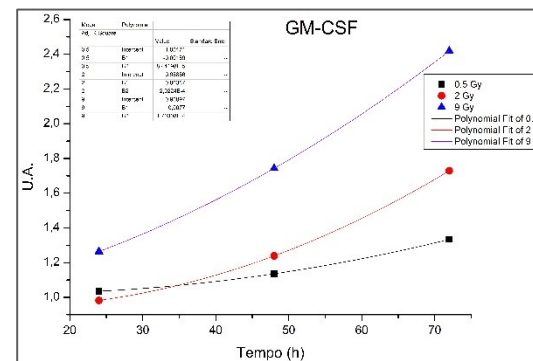

Supplement: rrz032_additional_file_2.pdf [file rrz032_additional_file_2.pdf]
