# Supplementary material for: Proton-irradiated breast cells: molecular points of view
Source: PubMed Central journal article supplement (PMC6640903; doi:10.1093/jrr/rrz032), 2019-05-28
Supplement: rrz032_additional_file_3.pdf [file rrz032_additional_file_3.pdf]

MCF7 ∩ MDA-MB-231 0,5 Gy treated: 27 gene signature

| PubMatrix    | Ionizing radiation | Radiation | Cancer     | Breast cancer | Proton   | Inflammation | Cell cycle | Apoptosis |
|--------------|--------------------|-----------|------------|---------------|----------|--------------|------------|-----------|
| COX18        | <u>0</u>           | <u>0</u>  | <u>1</u>   | <u>0</u>      | <u>1</u> | <u>1</u>     | <u>1</u>   | <u>1</u>  |
| ABCA10       | <u>0</u>           | <u>1</u>  | <u>5</u>   | <u>0</u>      | <u>0</u> | <u>0</u>     | <u>0</u>   | <u>0</u>  |
| ANKRD26      | <u>0</u>           | <u>1</u>  | <u>35</u>  | <u>1</u>      | <u>0</u> | <u>2</u>     | <u>1</u>   | <u>2</u>  |
| ARHGEF7      | <u>0</u>           | <u>1</u>  | <u>40</u>  | <u>8</u>      | <u>1</u> | <u>1</u>     | <u>44</u>  | <u>4</u>  |
| ATL2         | <u>0</u>           | <u>1</u>  | <u>4</u>   | <u>1</u>      | <u>0</u> | <u>0</u>     | <u>2</u>   | <u>1</u>  |
| C1orf189     | <u>0</u>           | <u>0</u>  | <u>0</u>   | <u>0</u>      | <u>0</u> | <u>0</u>     | <u>0</u>   | <u>0</u>  |
| C8orf34      | <u>0</u>           | <u>0</u>  | <u>1</u>   | <u>0</u>      | <u>0</u> | <u>0</u>     | <u>0</u>   | <u>0</u>  |
| C9orf131     | <u>0</u>           | <u>0</u>  | <u>0</u>   | <u>0</u>      | <u>0</u> | <u>0</u>     | <u>0</u>   | <u>0</u>  |
| CEP85L       | <u>0</u>           | <u>0</u>  | <u>7</u>   | <u>1</u>      | <u>0</u> | <u>0</u>     | <u>1</u>   | <u>0</u>  |
| COLQ         | <u>0</u>           | <u>0</u>  | <u>17</u>  | <u>0</u>      | <u>0</u> | <u>0</u>     | <u>0</u>   | <u>2</u>  |
| DDX10        | <u>0</u>           | <u>0</u>  | <u>21</u>  | <u>1</u>      | <u>0</u> | <u>0</u>     | <u>1</u>   | <u>1</u>  |
| DNAJC10      | <u>0</u>           | <u>0</u>  | <u>4</u>   | <u>0</u>      | <u>0</u> | <u>0</u>     | <u>1</u>   | <u>2</u>  |
| DOPEY1       | <u>0</u>           | <u>0</u>  | <u>1</u>   | <u>1</u>      | <u>0</u> | <u>0</u>     | <u>0</u>   | <u>1</u>  |
| EN1          | <u>0</u>           | <u>3</u>  | <u>59</u>  | <u>9</u>      | <u>0</u> | <u>9</u>     | <u>12</u>  | <u>20</u> |
| FAM13A-AS1   | <u>0</u>           | <u>0</u>  | <u>0</u>   | <u>0</u>      | <u>0</u> | <u>0</u>     | <u>0</u>   | <u>0</u>  |
| FLJ36777     | <u>0</u>           | <u>0</u>  | <u>0</u>   | <u>0</u>      | <u>0</u> | <u>0</u>     | <u>0</u>   | <u>0</u>  |
| INPP5D       | <u>0</u>           | <u>3</u>  | <u>78</u>  | <u>10</u>     | <u>0</u> | <u>61</u>    | <u>6</u>   | <u>22</u> |
| lnc-AC092031 | <u>5</u>           | <u>29</u> | <u>217</u> | <u>19</u>     | <u>3</u> | <u>48</u>    | <u>64</u>  | <u>66</u> |
| lnc-RNF39-4  | <u>0</u>           | <u>0</u>  | <u>0</u>   | <u>0</u>      | <u>0</u> | <u>0</u>     | <u>0</u>   | <u>0</u>  |
| MAGEL2       | <u>0</u>           | <u>0</u>  | <u>6</u>   | <u>1</u>      | <u>0</u> | <u>0</u>     | <u>4</u>   | <u>3</u>  |
| MGA          | <u>1</u>           | <u>16</u> | <u>140</u> | <u>46</u>     | <u>4</u> | <u>16</u>    | <u>26</u>  | <u>14</u> |
| MGC16142     | <u>0</u>           | <u>0</u>  | <u>0</u>   | <u>0</u>      | <u>0</u> | <u>0</u>     | <u>0</u>   | <u>0</u>  |
| SLC6A13      | <u>0</u>           | <u>2</u>  | <u>1</u>   | <u>0</u>      | <u>4</u> | <u>1</u>     | <u>0</u>   | <u>0</u>  |
| SSBP2        | <u>1</u>           | <u>4</u>  | <u>30</u>  | <u>2</u>      | <u>0</u> | <u>0</u>     | <u>3</u>   | <u>2</u>  |
| SUV39H2      | <u>1</u>           | <u>4</u>  | <u>39</u>  | <u>7</u>      | <u>0</u> | <u>3</u>     | <u>9</u>   | <u>10</u> |
| ZNF546       | <u>0</u>           | <u>0</u>  | <u>0</u>   | <u>0</u>      | <u>0</u> | <u>0</u>     | <u>0</u>   | <u>0</u>  |
| ZNF563       | <u>0</u>           | <u>0</u>  | <u>1</u>   | <u>0</u>      | <u>0</u> | <u>0</u>     | <u>0</u>   | <u>0</u>  |
