# Supplementary material for: Proton-irradiated breast cells: molecular points of view
Source: PubMed Central journal article supplement (PMC6640903; doi:10.1093/jrr/rrz032), 2019-05-28
Supplement: rrz032_additional_file_4.pdf [file rrz032_additional_file_4.pdf]

MCF7  $\cap$  MDA-MB-231 2 Gy treated: 51 gene signature

| PubMatrix    | Ionizing radiation | Radiation | Cancer     | Breast cancer | Proton    | Inflammation | Cell cycle | Apoptosis  |
|--------------|--------------------|-----------|------------|---------------|-----------|--------------|------------|------------|
| ABCA10       | <u>0</u>           | <u>1</u>  | <u>5</u>   | <u>0</u>      | <u>0</u>  | <u>0</u>     | <u>0</u>   | <u>0</u>   |
| ACTA1        | <u>0</u>           | <u>5</u>  | <u>10</u>  | <u>2</u>      | <u>1</u>  | <u>10</u>    | <u>7</u>   | <u>6</u>   |
| ADAMTSL4     | <u>0</u>           | <u>0</u>  | <u>5</u>   | <u>0</u>      | <u>0</u>  | <u>1</u>     | <u>0</u>   | <u>1</u>   |
| AMER2        | <u>0</u>           | <u>0</u>  | <u>4</u>   | <u>0</u>      | <u>0</u>  | <u>0</u>     | <u>0</u>   | <u>0</u>   |
| ARHGEF7      | <u>0</u>           | <u>1</u>  | <u>40</u>  | <u>8</u>      | <u>1</u>  | <u>1</u>     | <u>44</u>  | <u>4</u>   |
| ATPAF1       | <u>0</u>           | <u>0</u>  | <u>2</u>   | <u>0</u>      | <u>7</u>  | <u>0</u>     | <u>0</u>   | <u>1</u>   |
| C1orf86      | <u>0</u>           | <u>0</u>  | <u>0</u>   | <u>0</u>      | <u>0</u>  | <u>0</u>     | <u>0</u>   | <u>0</u>   |
| C8orf34      | <u>0</u>           | <u>0</u>  | <u>1</u>   | <u>0</u>      | <u>0</u>  | <u>0</u>     | <u>0</u>   | <u>0</u>   |
| C9orf131     | <u>0</u>           | <u>0</u>  | <u>0</u>   | <u>0</u>      | <u>0</u>  | <u>0</u>     | <u>0</u>   | <u>0</u>   |
| COL20A1      | <u>0</u>           | <u>0</u>  | <u>1</u>   | <u>1</u>      | <u>0</u>  | <u>0</u>     | <u>0</u>   | <u>0</u>   |
| CTSS         | <u>2</u>           | <u>8</u>  | <u>37</u>  | <u>6</u>      | <u>0</u>  | <u>31</u>    | <u>5</u>   | <u>22</u>  |
| DEFB123      | <u>0</u>           | <u>0</u>  | <u>0</u>   | <u>0</u>      | <u>0</u>  | <u>1</u>     | <u>0</u>   | <u>0</u>   |
| DOPEY1       | <u>0</u>           | <u>0</u>  | <u>1</u>   | <u>1</u>      | <u>0</u>  | <u>0</u>     | <u>0</u>   | <u>1</u>   |
| DUOX2        | <u>6</u>           | <u>18</u> | <u>98</u>  | <u>9</u>      | <u>9</u>  | <u>92</u>    | <u>14</u>  | <u>48</u>  |
| EN1          | <u>0</u>           | <u>3</u>  | <u>59</u>  | <u>9</u>      | <u>0</u>  | <u>9</u>     | <u>12</u>  | <u>20</u>  |
| FAM13A-AS1   | <u>0</u>           | <u>0</u>  | <u>0</u>   | <u>0</u>      | <u>0</u>  | <u>0</u>     | <u>0</u>   | <u>0</u>   |
| FAM19A2      | <u>0</u>           | <u>0</u>  | <u>0</u>   | <u>0</u>      | <u>0</u>  | <u>0</u>     | <u>0</u>   | <u>0</u>   |
| FAM223A      | <u>0</u>           | <u>0</u>  | <u>0</u>   | <u>0</u>      | <u>0</u>  | <u>0</u>     | <u>0</u>   | <u>0</u>   |
| FBLL1        | <u>0</u>           | <u>0</u>  | <u>0</u>   | <u>0</u>      | <u>0</u>  | <u>0</u>     | <u>0</u>   | <u>0</u>   |
| FIGF         | <u>0</u>           | <u>2</u>  | <u>17</u>  | <u>7</u>      | <u>0</u>  | <u>5</u>     | <u>7</u>   | <u>3</u>   |
| FLJ44715     | <u>0</u>           | <u>0</u>  | <u>0</u>   | <u>0</u>      | <u>0</u>  | <u>0</u>     | <u>0</u>   | <u>0</u>   |
| GPR87        | <u>0</u>           | <u>2</u>  | <u>17</u>  | <u>2</u>      | <u>0</u>  | <u>1</u>     | <u>2</u>   | <u>6</u>   |
| GPX7         | <u>1</u>           | <u>2</u>  | <u>20</u>  | <u>2</u>      | <u>0</u>  | <u>5</u>     | <u>7</u>   | <u>11</u>  |
| HAND1        | <u>1</u>           | <u>3</u>  | <u>36</u>  | <u>0</u>      | <u>0</u>  | <u>3</u>     | <u>10</u>  | <u>16</u>  |
| HIPK4        | <u>0</u>           | <u>0</u>  | <u>2</u>   | <u>0</u>      | <u>0</u>  | <u>0</u>     | <u>0</u>   | <u>2</u>   |
| INPP5D       | <u>0</u>           | <u>3</u>  | <u>78</u>  | <u>10</u>     | <u>0</u>  | <u>61</u>    | <u>6</u>   | <u>22</u>  |
| IRF4         | <u>4</u>           | <u>20</u> | <u>483</u> | <u>9</u>      | <u>2</u>  | <u>137</u>   | <u>59</u>  | <u>96</u>  |
| LINC00086    | <u>0</u>           | <u>0</u>  | <u>3</u>   | <u>0</u>      | <u>0</u>  | <u>0</u>     | <u>0</u>   | <u>0</u>   |
| LINC00421    | <u>0</u>           | <u>0</u>  | <u>0</u>   | <u>0</u>      | <u>0</u>  | <u>0</u>     | <u>0</u>   | <u>0</u>   |
| LINC00525    | <u>0</u>           | <u>0</u>  | <u>0</u>   | <u>0</u>      | <u>0</u>  | <u>0</u>     | <u>0</u>   | <u>0</u>   |
| lnc-GGCT-1   | <u>0</u>           | <u>0</u>  | <u>0</u>   | <u>0</u>      | <u>0</u>  | <u>0</u>     | <u>0</u>   | <u>0</u>   |
| LOC100128644 | <u>0</u>           | <u>0</u>  | <u>0</u>   | <u>0</u>      | <u>0</u>  | <u>0</u>     | <u>0</u>   | <u>0</u>   |
| LOC100506538 | <u>0</u>           | <u>0</u>  | <u>0</u>   | <u>0</u>      | <u>0</u>  | <u>0</u>     | <u>0</u>   | <u>0</u>   |
| LOC344887    | <u>0</u>           | <u>0</u>  | <u>4</u>   | <u>1</u>      | <u>0</u>  | <u>0</u>     | <u>1</u>   | <u>0</u>   |
| LRRC39       | <u>0</u>           | <u>0</u>  | <u>0</u>   | <u>0</u>      | <u>0</u>  | <u>0</u>     | <u>0</u>   | <u>0</u>   |
| LRRC48       | <u>0</u>           | <u>0</u>  | <u>0</u>   | <u>0</u>      | <u>0</u>  | <u>0</u>     | <u>0</u>   | <u>0</u>   |
| MARCH1       | <u>0</u>           | <u>1</u>  | <u>11</u>  | <u>0</u>      | <u>0</u>  | <u>6</u>     | <u>1</u>   | <u>4</u>   |
| MGC16142     | <u>0</u>           | <u>0</u>  | <u>0</u>   | <u>0</u>      | <u>0</u>  | <u>0</u>     | <u>0</u>   | <u>0</u>   |
| PGC          | <u>14</u>          | <u>68</u> | <u>791</u> | <u>77</u>     | <u>47</u> | <u>398</u>   | <u>286</u> | <u>539</u> |
| RNF19B       | <u>0</u>           | <u>0</u>  | <u>1</u>   | <u>0</u>      | <u>0</u>  | <u>1</u>     | <u>0</u>   | <u>1</u>   |
| SCN1B        | <u>0</u>           | <u>2</u>  | <u>9</u>   | <u>3</u>      | <u>0</u>  | <u>1</u>     | <u>0</u>   | <u>2</u>   |
| SCN4A        | <u>0</u>           | <u>2</u>  | <u>9</u>   | <u>1</u>      | <u>7</u>  | <u>1</u>     | <u>2</u>   | <u>1</u>   |
| SERPINC1     | <u>0</u>           | <u>2</u>  | <u>15</u>  | <u>1</u>      | <u>0</u>  | <u>6</u>     | <u>0</u>   | <u>2</u>   |
| SLC6A13      | <u>0</u>           | <u>2</u>  | <u>1</u>   | <u>0</u>      | <u>4</u>  | <u>1</u>     | <u>0</u>   | <u>0</u>   |
| SPIRE1       | <u>0</u>           | <u>0</u>  | <u>2</u>   | <u>0</u>      | <u>0</u>  | <u>1</u>     | <u>2</u>   | <u>1</u>   |
| SPTBN5       | <u>0</u>           | <u>0</u>  | <u>2</u>   | <u>0</u>      | <u>0</u>  | <u>0</u>     | <u>0</u>   | <u>0</u>   |
| SSBP2        | <u>1</u>           | <u>4</u>  | <u>30</u>  | <u>2</u>      | <u>0</u>  | <u>0</u>     | <u>3</u>   | <u>2</u>   |
| TNFSF15      | <u>0</u>           | <u>3</u>  | <u>78</u>  | <u>6</u>      | <u>0</u>  | <u>89</u>    | <u>13</u>  | <u>43</u>  |
| TRIM22       | <u>1</u>           | <u>1</u>  | <u>20</u>  | <u>2</u>      | <u>0</u>  | <u>7</u>     | <u>9</u>   | <u>6</u>   |
| ZNF516       | <u>0</u>           | <u>0</u>  | <u>6</u>   | <u>1</u>      | <u>0</u>  | <u>0</u>     | <u>1</u>   | <u>0</u>   |
| ZNF563       | <u>0</u>           | <u>0</u>  | <u>1</u>   | <u>0</u>      | <u>0</u>  | <u>0</u>     | <u>0</u>   | <u>0</u>   |
