# Supplementary material for: Proton-irradiated breast cells: molecular points of view
Source: PubMed Central journal article supplement (PMC6640903; doi:10.1093/jrr/rrz032), 2019-05-28
Supplement: rrz032_additional_file_5.pdf [file rrz032_additional_file_5.pdf]

|             |           |           |            |           |           |            |            |            |
|-------------|-----------|-----------|------------|-----------|-----------|------------|------------|------------|
| PGC         | <u>14</u> | <u>68</u> | <u>791</u> | <u>77</u> | <u>47</u> | <u>398</u> | <u>286</u> | <u>539</u> |
| RGAG1       | <u>0</u>  | <u>0</u>  | <u>1</u>   | <u>0</u>  | <u>0</u>  | <u>0</u>   | <u>0</u>   | <u>0</u>   |
| SCN4A       | <u>0</u>  | <u>2</u>  | <u>9</u>   | <u>1</u>  | <u>7</u>  | <u>1</u>   | <u>2</u>   | <u>1</u>   |
| SLC25A5-AS1 | <u>0</u>  | <u>0</u>  | <u>2</u>   | <u>0</u>  | <u>0</u>  | <u>0</u>   | <u>1</u>   | <u>1</u>   |
| SLC6A13     | <u>0</u>  | <u>2</u>  | <u>1</u>   | <u>0</u>  | <u>4</u>  | <u>1</u>   | <u>0</u>   | <u>0</u>   |
| SPIRE1      | <u>0</u>  | <u>0</u>  | <u>2</u>   | <u>0</u>  | <u>0</u>  | <u>1</u>   | <u>2</u>   | <u>1</u>   |
| SPRR2G      | <u>0</u>  | <u>0</u>  | <u>2</u>   | <u>0</u>  | <u>0</u>  | <u>0</u>   | <u>0</u>   | <u>0</u>   |
| SSH2        | <u>0</u>  | <u>0</u>  | <u>6</u>   | <u>0</u>  | <u>0</u>  | <u>0</u>   | <u>1</u>   | <u>1</u>   |
| TESPA1      | <u>0</u>  | <u>0</u>  | <u>1</u>   | <u>0</u>  | <u>1</u>  | <u>1</u>   | <u>0</u>   | <u>0</u>   |
| TMED3       | <u>0</u>  | <u>0</u>  | <u>4</u>   | <u>0</u>  | <u>0</u>  | <u>0</u>   | <u>1</u>   | <u>0</u>   |
| TNFRSF13C   | <u>0</u>  | <u>2</u>  | <u>71</u>  | <u>1</u>  | <u>0</u>  | <u>32</u>  | <u>15</u>  | <u>52</u>  |
| TNFSF15     | <u>0</u>  | <u>3</u>  | <u>78</u>  | <u>6</u>  | <u>0</u>  | <u>89</u>  | <u>13</u>  | <u>43</u>  |
| TPTE2P6     | <u>0</u>  | <u>0</u>  | <u>0</u>   | <u>0</u>  | <u>0</u>  | <u>0</u>   | <u>1</u>   | <u>0</u>   |
| TRIM22      | <u>1</u>  | <u>1</u>  | <u>20</u>  | <u>2</u>  | <u>0</u>  | <u>7</u>   | <u>9</u>   | <u>6</u>   |
| VWCE        | <u>1</u>  | <u>2</u>  | <u>1</u>   | <u>0</u>  | <u>0</u>  | <u>0</u>   | <u>0</u>   | <u>0</u>   |
