# Supplementary material for: Proton-irradiated breast cells: molecular points of view
Source: PubMed Central journal article supplement (PMC6640903; doi:10.1093/jrr/rrz032), 2019-05-28
Supplement: rrz032_additional_file_6.pdf [file rrz032_additional_file_6.pdf]

### 8 gene signature

| PubMatrix  | Ionizing radiation | Radiation | Cancer    | Breast cancer | Proton   | Inflammation | Cell cycle | Apoptosis |
|------------|--------------------|-----------|-----------|---------------|----------|--------------|------------|-----------|
| ABCA10     | <u>0</u>           | <u>1</u>  | <u>5</u>  | <u>0</u>      | <u>0</u> | <u>0</u>     | <u>0</u>   | <u>0</u>  |
| C8orf34    | <u>0</u>           | <u>0</u>  | <u>1</u>  | <u>0</u>      | <u>0</u> | <u>0</u>     | <u>0</u>   | <u>0</u>  |
| C9orf131   | <u>0</u>           | <u>0</u>  | <u>0</u>  | <u>0</u>      | <u>0</u> | <u>0</u>     | <u>0</u>   | <u>0</u>  |
| EN1        | <u>0</u>           | <u>3</u>  | <u>59</u> | <u>9</u>      | <u>0</u> | <u>9</u>     | <u>12</u>  | <u>20</u> |
| FAM13A-AS1 | <u>0</u>           | <u>0</u>  | <u>0</u>  | <u>0</u>      | <u>0</u> | <u>0</u>     | <u>0</u>   | <u>0</u>  |
| INPP5D     | <u>0</u>           | <u>3</u>  | <u>78</u> | <u>10</u>     | <u>0</u> | <u>61</u>    | <u>6</u>   | <u>22</u> |
| MGC16142   | <u>0</u>           | <u>0</u>  | <u>0</u>  | <u>0</u>      | <u>0</u> | <u>0</u>     | <u>0</u>   | <u>0</u>  |
| SLC6A13    | <u>0</u>           | <u>2</u>  | <u>1</u>  | <u>0</u>      | <u>4</u> | <u>1</u>     | <u>0</u>   | <u>0</u>  |
